# Supplementary material for: Chemotherapy-Related Amenorrhea and Menopause in Young Chinese Breast Cancer Patients: Analysis on Incidence, Risk Factors and Serum Hormone Profiles
Source: PLoS One. 2015 Oct 20;10(10):e0140842. doi: 10.1371/journal.pone.0140842 (PMC4613138; doi:10.1371/journal.pone.0140842)
Supplement: S1 Table — (XLSX) [file pone.0140842.s001.xlsx]

## Sheet: qol007_table1
p_no	age_dx_g	bmi_dx_nga	g_bmi_dx_nga	educate	height	weight	child_num	smoke	alcohol	f_dr_bc	max_t_stage	nodal_pos	max_tnm	er_pos	pr_pos	her2_o_e	t_surg	t_alnd	adj_rt	a_regimen	g_chemo_dur	u_cort	tamoxifen	trastuzumab	u_tcm	s_mens	f_meno
PW001	3	1	0	2	165	48.4	1	0	0	0	1	0	1	0	0	1	1	1	0	1	1	1	0	0	1	1	1
PW002	3	2	0	2	156	52	1	0	0	0	1	0	1	1	1	0	1	1	0	1	0	1	1	0	1	1	0
PW003	1	2	0	2	170	55.5	1	0	0	0	1	0	1	1	1	0	0	1	2	1	0	1	1	0	0	1	0
PW004	3	4	1	1	161	68.5	1	0	0	0	1	1	2	0	0	0	0	1	1	3	0	1	0	0	0	1	1
PW005	2	1	0	2	162	39	1	0	0	0	1	1	1	0	0	0	1	1	1	3	1	0	0	0	0	1	1
PW006	2	2	0	2	161	57	1	0	0	0	2	0	2	1	0	0	1	1	2	2	1	0	1	0	0	1	1
PW007	2	3	1	3	155	57	1	0	0	0	2	0	2	1	1	0	1	1	1	1	1	0	1	0	0	1	0
PW008	3	3	1	2	169	67	1	0	0	0	3	1	3	1	1	0	1	1	1	1	0	0	1	0	0	1	1
PW009	3	2	0	2	162	49	1	0	0	0	1	0	1	0	0	0	0	1	2	1	1	1	0	0	1	1	0
PW010	3	4	1	1	159	73.4	1	0	0	0	2	0	2	1	1	0	1	1	0	1	0	1	1	0	0	1	1
PW011	1	1	0	3	163	49	0	0	0	0	2	1	2	1	1	0	1	1	1	4	1	1	1	0	0	1	0
PW012	3	2	0	2	156	50.5	1	0	0	0	1	0	1	1	1	0	1	1	0	1	0	1	1	0	1	1	1
PW013	3	2	0	3	161	58	1	0	0	0	2	1	2	1	1	0	1	1	1	1	1	1	1	0	0	1	0
PW014	3	1	0	1	158	43.5	1	0	0	0	2	0	2	1	1	0	1	1	0	1	0	1	1	0	1	1	1
PW015	3	4	1	2	156	61	1	0	0	0	2	0	2	0	0	1	1	1	0	1	1	1	0	0	0	1	0
PW016	3	2	0	2	164	51.5	1	1	0	0	2	1	2	0	1	0	1	1	1	1	0	1	0	0	1	1	1
PW017	3	1	0	2	162	47	1	0	0	0	2	0	2	1	1	0	0	1	2	1	0	1	1	0	0	1	1
PW018	2	3	1	2	161	60.8	0	0	0	0	1	1	2	0	0	1	1	1	0	3	1	1	0	0	0	1	0
PW019	3	3	1	1	169	70	1	0	0	0	2	0	2	1	1	0	1	1	0	5	1	1	1	0	0	1	1
PW020	2	4	1	2	156	67.8	1	0	0	0	2	0	2	0	0	0	1	1	0	1	0	0	0	0	1	1	0
PW021	1	2	0	2	168	53.5	0	1	0	0	2	1	2	1	0	0	1	1	1	3	1	1	1	0	0	1	1
PW022	3	2	0	1	161	53	1	0	0	0	2	1	2	0	0	0	1	1	1	3	1	1	0	0	0	1	1
PW023	3	2	0	1	151	45	1	0	0	0	1	0	1	0	0	0	0	1	2	1	0	1	0	0	1	1	0
PW025	3	1	0	2	155	52	0	0	0	0	1	1	2	1	1	0	1	1	1	4	1	1	1	0	0	1	1
PW026	3	2	0	2	162	56	1	0	0	0	1	1	2	0	0	0	1	1	1	1	0	1	0	0	1	1	1
PW027	2	4	1	1	155	77	1	0	0	0	2	0	2	1	1	0	1	1	2	2	1	0	1	0	0	1	0
PW028	3	3	1	1	166	66	1	0	0	0	2	1	2	0	0	0	1	1	1	1	0	1	0	0	0	1	1
PW029	3	2	0	2	156	53	1	0	0	0	2	1	2	1	1	0	1	1	1	4	1	1	1	0	0	1	1
PW030	2	2	0	2	157	56.5	1	0	0	0	1	0	1	1	1	0	0	1	2	1	0	1	1	0	0	1	0
PW031	3	2	0	4	161	53	1	0	0	0	2	0	2	0	0	0	0	1	2	1	0	1	0	0	0	1	1
PW032	3	2	0	2	161	49	1	0	0	0	1	0	1	0	0	0	1	1	0	1	1	1	0	0	0	1	1
PW033	2	2	0	2	161	52.5	0	0	0	0	2	1	2	1	1	0	0	1	1	3	1	1	1	0	0	1	1
PW034	2	1	0	2	159	43	1	0	0	0	2	0	2	1	1	0	1	1	2	1	1	1	1	0	1	1	1
PW035	3	2	0	2	153	47.2	0	0	0	0	2	1	2	1	0	0	1	1	1	5	1	1	1	0	0	1	1
PW036	3	1	0	2	162	46.4	1	1	1	0	1	1	2	0	0	1	0	1	2	5	1	1	1	0	0	1	1
PW037	1	3	1	2	160.5	61.5	1	0	0	0	2	0	2	0	0	0	0	1	2	1	1	1	0	0	0	1	1
PW038	2	1	0	2	168	52	1	0	0	0	1	0	1	1	1	0	1	1	2	1	1	1	1	0	0	1	1
PW039	3	2	0	2	168	59	1	0	0	0	1	1	2	1	1	0	0	1	2	4	1	1	1	0	0	1	0
PW040	2	2	0	2	159	49	1	0	0	0	1	0	1	1	1	0	1	1	0	1	1	1	1	0	0	1	1
PW041	3	2	0	2	168	60.5	1	0	0	0	2	0	2	1	1	0	1	1	0	1	0	1	1	0	0	1	1
PW042	3	2	0	3	160	55.5	0	0	0	0	2	0	2	1	1	0	0	1	2	1	1	1	1	0	0	1	0
PW043	1	2	0	2	166	59.6	1	0	0	0	2	0	2	1	1	0	1	1	2	1	0	1	1	0	0	1	0
PW044	2	1	0	2	162	61	1	0	0	0	1	1	2	1	1	0	1	1	1	1	0	1	1	0	0	1	0
PW045	2	4	1	2	151	62	1	0	0	0	1	0	1	0	0	0	0	1	2	1	0	1	0	0	1	1	0
PW046	1	4	1	2	162	81.4	1	0	0	0	2	0	2	0	0	1	1	1	2	3	1	1	0	0	0	1	0
PW047	3	2	0	2	165	52	0	0	0	0	3	1	3	0	0	1	1	1	2	4	1	1	0	0	1	1	1
PW048	2	2	0	1	161	54	1	1	0	0	2	0	1	1	1	0	1	1	0	1	1	1	1	0	0	1	1
PW049	2	1	0	2	147	49	0	0	0	0	1	0	1	1	1	0	0	1	2	1	0	1	1	0	1	1	0
PW050	2	2	0	2	155	55	0	0	0	0	2	0	2	1	1	0	1	1	1	3	1	1	1	0	1	1	1
PW051	3	2	0	2	149	47	1	0	0	0	2	0	2	1	1	0	1	1	0	1	0	1	1	0	0	1	1
PW052	2	2	0	4	153	50	0	0	0	0	2	1	2	1	1	0	1	1	1	4	1	1	1	0	1	1	0
PW053	3	2	0	2	155	51.6	1	0	0	0	2	1	2	1	1	0	1	1	0	4	1	1	1	0	1	1	0
PW054	3	3	1	2	156	59	1	0	0	0	2	1	2	1	1	0	1	1	1	4	1	1	1	0	0	1	1
PW055	3	3	1	2	157	58.4	1	0	0	1	1	0	1	0	0	0	1	1	0	1	0	1	0	0	1	1	1
PW056	1	2	0	2	162	52.5	0	0	0	1	1	0	2	1	0	0	1	1	1	3	1	1	1	0	1	1	0
PW057	3	2	0	4	157	56.5	1	0	0	0	1	0	1	1	1	0	0	1	2	1	0	1	1	0	0	1	1
PW058	2	2	0	1	157	54.5	1	0	0	0	1	1	2	1	1	0	1	1	0	4	1	1	1	0	0	1	1
PW059	2	3	1	2	162	61	0	0	0	0	1	0	1	1	1	0	1	1	0	1	0	1	1	0	0	1	0
PW060	3	3	1	2	158	62	0	0	0	0	1	1	2	0	0	1	0	1	2	3	1	1	0	0	0	1	1
PW061	3	2	0	2	152	49.5	1	0	0	1	2	0	2	0	0	0	0	1	2	1	1	1	0	0	0	1	1
PW062	2	2	0	3	154	46.5	1	0	0	0	2	0	2	0	0	1	1	1	0	1	1	1	0	0	0	1	0
PW063	3	3	1	2	147	52	1	0	0	0	2	1	2	0	0	1	1	1	1	4	1	1	0	0	0	1	1
PW064	2	1	0	2	162	47.5	1	0	0	0	1	0	1	1	0	0	1	1	0	1	1	1	1	0	0	1	0
PW065	2	2	0	3	154	45	1	0	0	0	1	1	3	1	0	0	0	1	1	4	1	1	1	0	0	1	0
PW066	3	3	1	1	157	58	1	0	0	0	2	0	2	1	1	0	1	1	2	2	1	0	1	0	0	1	1
PW067	3	2	0	1	158	55	1	0	0	0	1	0	1	1	1	0	1	1	0	1	1	1	1	0	0	1	1
PW068	3	3	1	1	161	62	1	0	0	0	2	1	2	1	1	0	1	1	1	4	1	1	1	0	0	1	1
PW069	3	4	1	1	153	62.8	1	0	0	0	2	0	2	1	1	0	0	1	2	1	0	1	1	0	0	1	0
PW070	2	2	0	2	158	56	1	0	0	0	1	0	1	1	1	0	1	1	2	1	0	1	1	0	0	1	1
PW071	1	2	0	2	155	47	1	0	0	0	2	1	2	1	1	1	1	1	0	4	1	1	1	0	0	1	0
PW072	3	2	0	1	153	53.2	1	0	0	0	2	1	3	0	1	1	1	1	1	4	1	1	1	0	1	1	0
PW073	3	2	0	1	160	54.5	1	0	0	1	2	1	2	1	1	0	1	1	1	4	1	1	1	0	0	1	0
PW074	3	4	1	2	166	69.5	1	0	0	0	2	0	2	1	1	0	0	1	2	1	0	1	1	0	0	1	0
PW075	2	2	0	2	149	49	1	0	0	0	2	0	2	1	1	0	1	1	0	1	1	1	1	0	0	1	0
PW076	2	1	0	2	163	48	0	0	0	0	1	0	1	1	1	1	0	1	2	1	0	1	1	0	1	1	1
PW077	3	2	0	2	150	44.5	1	0	0	0	2	0	2	1	1	1	1	1	0	1	0	1	1	0	0	1	0
PW078	2	1	0	2	170	52	0	0	0	0	1	0	1	1	1	0	1	1	0	1	0	1	1	0	0	1	0
PW079	3	3	1	1	153	55	1	0	0	0	1	1	1	0	1	0	1	1	1	1	1	1	1	0	0	1	1
PW080	3	3	1	2	169	66.2	1	0	0	0	2	0	2	0	0	0	0	1	2	5	1	0	0	0	0	1	1
PW081	2	2	0	1	159.5	47	1	0	0	0	2	1	2	1	1	0	1	1	1	1	0	1	1	0	0	1	0
PW082	2	2	0	2	160	58	1	0	0	0	1	1	2	0	0	1	0	1	1	3	1	1	0	0	0	1	1
PW083	1	2	0	2	154	48	1	0	0	0	1	0	1	1	0	0	1	1	0	1	1	1	1	0	0	1	0
PW084	2	4	1	3	150	63.5	1	0	0	0	2	1	2	1	1	0	1	1	0	4	1	1	1	0	0	1	1
PW085	3	4	1	2	148	55.8	1	0	0	0	2	1	3	1	1	0	1	1	1	5	1	1	1	0	1	1	0
PW086	2	2	0	3	158	46.5	0	0	0	0	2	1	2	1	1	0	1	1	1	4	1	1	1	0	1	1	0
PW087	2	2	0	2	167	53.7	1	0	0	0	1	1	2	1	1	0	0	1	2	4	1	1	1	0	1	1	1
PW088	3	2	0	2	162	49	1	0	0	0	1	1	2	1	1	0	1	1	0	1	0	1	1	0	0	1	0
PW090	2	3	1	1	156	60	1	0	0	1	2	0	2	0	0	0	0	0	1	2	1	0	0	0	1	1	1
PW091	3	2	0	2	151	46.2	0	0	0	0	1	0	1	1	1	0	1	1	0	1	0	1	1	0	1	1	0
PW092	3	2	0	2	155	50.5	1	0	0	0	1	1	2	1	1	0	1	1	1	3	1	1	1	0	0	1	1
PW093	3	2	0	2	158	49.6	1	0	0	0	1	1	2	1	1	0	1	1	1	4	1	1	1	0	1	1	0
PW094	3	2	0	2	163	56.5	1	0	0	0	1	0	1	0	0	0	0	1	2	1	0	1	0	0	0	1	1
PW095	3	2	0	2	151	48	1	0	0	0	1	0	1	1	1	1	0	1	2	1	0	1	1	0	0	1	0
PW096	1	2	0	2	168	60.8	0	0	0	0	1	0	1	0	0	0	0	1	2	4	1	0	0	0	0	1	0
PW097	3	2	0	2	150	51.5	1	0	0	0	2	0	2	1	1	0	1	1	2	1	1	1	1	0	0	1	1
PW098	2	2	0	2	141	56.5	0	0	0	0	2	0	2	1	1	0	1	1	2	2	1	0	1	0	0	2	0
PW099	3	2	0	2	169.5	64	1	0	0	0	2	0	2	1	1	0	1	1	0	1	1	1	1	0	0	1	0
PW100	3	2	0	2	163	53.4	1	0	0	0	2	1	3	1	1	1	1	1	1	1	1	1	1	0	1	1	1
PW101	3	1	0	3	155	44	1	0	0	0	1	0	1	0	0	1	1	1	0	1	0	1	0	0	1	1	1
PW102	3	3	1	2	164	66.8	1	0	0	0	1	0	1	1	1	0	1	1	0	1	0	1	1	0	1	2	1
PW103	2	2	0	2	153	44.5	1	0	0	1	1	0	1	1	1	0	0	1	2	1	0	1	1	0	0	1	1
PW104	2	1	0	2	155	40	1	0	0	0	1	1	3	1	1	0	0	1	1	4	1	1	1	0	0	1	0
PW105	3	3	1	2	152	56.4	1	0	0	0	2	0	2	1	1	0	0	1	2	1	0	1	1	0	1	1	1
PW106	1	2	0	2	164	56.5	1	0	0	1	1	0	1	0	0	0	1	1	0	1	0	1	0	0	0	2	0
PW107	3	1	0	4	167	51	0	0	0	0	1	0	1	1	0	0	1	1	0	2	1	1	1	0	1	1	1
PW108	3	4	1	2	168	88.5	0	0	0	0	1	0	1	1	1	0	1	1	0	1	0	1	1	0	0	1	1
PW109	2	4	1	2	167	81.8	0	0	0	0	2	1	3	0	0	1	1	1	1	4	1	1	0	0	0	2	0
PW110	3	2	0	2	164	51	1	0	0	1	2	0	2	1	1	1	1	1	2	1	1	1	1	0	0	2	1
PW111	3	2	0	2	168	59.5	0	0	0	0	1	0	1	0	0	1	1	1	0	1	1	1	0	0	0	1	1
PW112	1	2	0	2	157	47.4	1	0	0	0	2	0	2	1	1	0	1	1	0	1	0	1	1	0	1	1	0
PW113	2	3	1	2	157	57.3	1	0	0	0	2	0	2	1	1	0	1	1	0	1	1	1	1	0	1	1	1
PW114	3	2	0	2	168	64	1	0	0	0	1	0	1	1	1	0	1	1	0	1	1	1	1	0	1	1	1
PW115	3	2	0	2	163	50.6	1	0	0	0	1	0	1	1	1	0	0	1	2	4	1	1	1	0	0	1	1
PW116	3	4	1	2	155	69	1	0	0	0	1	1	2	0	1	1	1	1	0	4	1	1	1	0	0	1	1
PW117	2	1	0	3	160	43	1	0	0	0	2	0	2	1	1	0	1	1	0	1	1	1	1	0	0	1	0
PW118	3	2	0	2	152	43	0	0	0	0	1	1	2	1	1	0	1	1	0	1	1	1	1	0	0	1	1
PW119	3	2	0	2	158	49	1	0	0	0	2	1	2	1	1	0	1	1	1	3	1	1	1	0	1	1	1
PW120	3	2	0	4	155	49.5	1	0	0	0	1	0	1	1	1	0	0	1	2	1	0	1	1	0	0	1	1
PW121	3	4	1	1	159	69	1	0	0	0	1	0	1	0	0	1	1	1	0	1	1	1	0	0	0	1	0
PW122	2	2	0	2	157	53	0	0	0	0	2	1	2	1	1	1	1	1	1	1	1	1	0	0	0	1	0
PW123	1	2	0	2	165	58	1	0	0	0	1	0	1	1	1	0	1	1	0	1	1	1	1	0	0	1	0
PW124	3	2	0	2	156	55	1	0	0	0	2	1	3	1	1	0	1	1	1	4	1	1	1	0	0	1	1
PW125	3	4	1	1	160	68	1	0	0	0	2	0	2	0	0	0	1	1	0	1	0	1	0	0	1	1	0
PW126	1	1	0	2	159	46	0	0	0	0	1	1	2	0	0	0	0	1	1	1	0	1	0	0	1	1	0
PW127	3	2	0	3	159	53	0	0	0	0	1	1	3	0	0	0	1	1	1	4	1	1	0	0	1	1	0
PW128	1	2	0	2	155	51.5	1	0	0	0	2	0	2	1	1	0	0	1	2	1	0	1	1	0	0	1	0
PW129	1	2	0	2	160	53.5	1	1	0	0	1	1	1	0	1	0	0	1	1	1	0	1	1	0	0	1	0
PW130	2	2	0	2	170	64	1	0	0	0	2	1	3	1	0	0	0	1	2	3	1	0	1	0	0	1	0
PW131	1	2	0	2	165	60	0	0	0	0	1	0	1	0	0	0	1	1	0	4	1	1	0	0	0	1	0
PW132	2	3	1	1	164	63.5	1	0	0	0	1	1	2	1	1	0	0	1	1	5	1	1	1	0	0	1	0
PW133	1	2	0	3	158	49	0	0	0	0	1	0	1	0	0	0	0	1	2	1	0	1	0	0	1	1	0
PW134	3	3	1	2	160	59	1	0	0	0	1	0	1	1	1	0	1	1	0	1	0	1	1	0	0	1	1
PW135	2	2	0	2	164	53	1	0	0	0	1	0	1	1	0	0	0	1	2	1	1	1	1	0	0	1	0
PW136	3	2	0	4	158	49	1	0	0	0	1	1	2	1	0	0	0	1	1	1	1	1	1	0	0	1	0
PW138	2	4	1	2	173	75.8	0	0	0	1	2	1	2	1	1	0	1	1	2	5	1	1	1	0	0	1	0
PW139	3	4	1	2	164	72	1	0	0	1	2	0	2	0	0	0	1	1	2	1	1	1	0	0	0	1	1
PW140	3	4	1	2	170	80.5	1	0	0	0	2	1	2	1	0	0	1	1	1	1	0	1	1	0	0	1	1
PW141	3	1	0	2	160	47	1	0	0	0	1	0	1	0	0	0	1	1	2	1	0	1	0	0	1	1	1
PW142	3	2	0	2	154	53	1	0	0	0	2	1	2	1	1	0	0	1	1	3	1	1	1	0	1	1	1
PW143	3	2	0	3	162	54.6	1	0	0	0	2	1	3	0	0	1	1	1	1	4	1	1	0	0	0	1	0
PW144	3	3	1	2	157	59	1	0	0	0	1	0	1	1	1	0	0	1	2	1	1	1	1	0	0	1	1
PW145	2	2	0	2	162	55	0	0	0	0	2	0	2	1	0	0	0	1	2	1	1	1	1	0	0	1	1
PW146	3	2	0	2	155	48	1	0	0	0	1	0	1	0	0	0	1	1	0	1	0	1	0	0	0	1	0
PW147	3	3	1	1	155	58	1	0	0	0	2	0	2	0	0	1	1	1	0	1	0	1	0	0	0	1	1
PW148	3	4	1	2	155	63.4	1	0	0	0	1	0	1	0	0	0	0	1	2	1	0	1	0	0	0	1	1
PW150	3	3	1	1	160	62	1	0	0	0	2	0	2	1	1	1	1	1	0	1	1	1	1	0	0	1	1
PW151	3	2	0	3	158	48.6	0	0	0	0	1	1	2	1	1	0	0	1	2	4	1	1	1	0	1	1	0
PW152	2	2	0	2	158	50	0	1	0	0	2	0	2	1	1	0	1	1	0	2	1	0	1	0	0	2	0
PW153	3	2	0	2	162	57	1	0	0	0	2	1	3	0	1	0	1	1	1	3	1	1	1	0	1	1	1
PW154	2	2	0	1	160.5	52	1	0	0	0	1	1	2	0	0	0	1	1	0	5	1	1	0	0	0	1	0
PW155	3	3	1	2	155	58	1	0	0	0	2	1	2	1	0	0	1	1	1	1	1	1	1	0	0	1	0
PW156	3	4	1	2	154	63.5	1	0	0	0	1	0	1	1	1	0	1	1	0	1	0	1	1	0	0	1	1
PW157	1	2	0	2	170	66.2	1	0	0	0	2	1	2	1	1	0	0	1	2	4	1	1	1	0	0	1	0
PW158	2	2	0	2	156.5	46	0	0	0	0	1	1	2	1	0	0	1	1	1	3	1	1	1	0	1	1	1
PW159	1	2	0	2	163	59.5	1	0	0	0	2	1	2	1	1	0	1	1	1	3	1	1	1	0	0	1	0
PW160	3	2	0	4	162	57	0	0	0	0	1	0	2	1	1	0	0	1	2	1	0	1	1	0	1	1	1
PW161	3	4	1	2	156	65	1	0	0	0	2	1	3	1	0	0	1	1	1	3	1	1	1	0	0	1	1
PW162	2	3	1	4	166	68	1	0	0	1	3	0	3	1	1	0	1	1	1	3	1	1	1	0	1	1	1
PW163	3	4	1	2	155	69	1	0	0	0	1	1	3	1	0	0	0	1	1	3	1	1	1	0	0	1	1
PW164	1	2	0	2	165	53.3	1	0	0	0	1	0	1	1	1	0	1	1	2	2	1	0	1	0	1	2	0
PW165	3	2	0	2	158	52	0	0	0	0	1	1	2	1	1	0	0	1	2	5	1	1	1	0	1	1	0
PW166	2	1	0	4	166	50	1	0	0	0	1	1	2	0	0	0	1	1	1	4	1	1	0	0	1	1	0
PW167	3	1	0	1	165	45	0	0	0	0	2	0	2	1	1	0	1	1	2	1	0	1	1	0	0	1	1
PW168	1	2	0	2	155	53	1	0	0	0	1	0	1	0	0	0	1	1	1	1	0	0	0	0	0	2	0
PW169	3	2	0	2	154	48.4	1	0	0	0	1	0	1	0	0	1	1	1	0	1	1	1	0	0	0	1	1
PW170	2	1	0	2	157	43.8	0	0	0	0	2	0	2	0	1	0	0	1	2	1	1	1	1	0	0	1	0
PW171	3	2	0	2	159	52	1	0	0	0	2	1	2	0	0	0	0	1	2	4	0	1	0	0	1	1	0
PW172	2	2	0	2	161	52.8	1	0	0	0	1	1	1	1	0	0	1	1	1	5	1	1	1	0	0	1	0
PW173	3	2	0	1	161	53.5	0	0	0	0	1	0	1	1	0	0	1	1	0	1	1	1	1	0	0	1	1
PW174	3	4	1	2	164	78	0	1	0	0	2	0	2	1	1	0	1	1	2	1	1	1	1	0	0	1	0
PW175	3	2	0	2	150	51.5	1	0	0	0	2	0	2	1	1	0	1	1	0	1	0	1	1	0	0	2	1
PW176	3	4	1	1	161	68	1	0	0	0	1	0	1	1	1	0	1	1	0	2	1	1	1	0	1	1	1
PW177	3	2	0	2	161	54	1	0	0	0	2	1	2	1	1	0	0	1	1	1	0	1	1	0	1	1	1
PW178	3	4	1	2	150	86	1	0	0	0	2	0	2	1	1	0	1	1	2	1	0	1	1	0	0	2	0
PW179	2	1	0	2	156	44	1	0	0	0	2	0	2	1	1	0	1	1	0	1	1	1	1	0	0	1	0
PW180	3	2	0	2	146	42	1	1	0	0	1	1	2	1	1	0	1	1	0	4	1	1	1	0	0	1	0
PW181	3	4	1	2	162	79.5	1	0	0	0	2	0	2	1	1	0	1	1	0	1	0	1	1	0	0	1	1
PW182	2	2	0	2	153	45	1	0	0	0	1	1	2	1	1	0	0	1	2	1	1	1	1	0	1	1	0
PW184	3	3	1	1	158	58	1	0	0	0	2	1	3	1	1	0	1	1	1	4	1	1	1	0	0	1	1
PW185	1	2	0	2	164	57	1	0	0	0	1	0	1	1	1	0	1	1	0	2	1	1	1	0	1	2	0
PW186	2	2	0	2	160	51	0	0	0	1	1	0	1	1	1	0	1	1	2	1	1	1	1	0	0	1	0
PW187	2	2	0	2	160	56.4	1	0	0	0	2	1	2	1	1	0	1	1	1	1	1	1	1	0	0	1	0
PW188	1	4	1	3	166	69.5	0	0	0	0	1	1	2	1	1	0	1	1	0	4	1	1	1	0	0	2	1
PW189	2	1	0	2	162	47	1	0	0	0	2	0	2	1	1	0	0	1	2	4	1	1	1	0	1	1	1
PW190	1	1	0	3	162	47	0	0	0	0	1	1	2	1	1	0	1	1	1	1	1	1	1	0	1	1	0
PW191	2	4	1	4	156	63	0	0	0	0	1	0	1	0	0	0	1	1	0	2	1	1	0	0	0	1	1
PW192	3	3	1	2	158	60	1	0	0	0	1	0	1	1	1	0	1	1	2	2	1	0	1	0	0	1	1
PW193	2	1	0	2	159	45.8	0	0	0	0	1	1	2	1	1	1	1	1	0	4	1	1	1	0	1	2	0
PW194	2	3	1	2	156	58	0	0	0	0	1	0	1	1	1	0	1	1	0	1	1	1	1	0	0	1	1
PW195	1	2	0	2	168	59	0	0	0	0	1	0	1	1	1	0	0	1	2	1	1	1	1	0	0	1	0
PW196	2	2	0	4	164	50.5	1	0	0	0	2	1	2	1	1	0	0	1	1	1	0	1	1	0	0	1	0
PW197	3	2	0	2	168	56.5	1	0	0	0	2	1	2	1	1	0	1	1	1	1	1	1	1	0	0	2	1
PW198	3	4	1	1	148	65	0	0	0	0	1	0	1	1	1	0	1	1	0	1	0	1	1	0	0	1	1
PW199	2	2	0	2	162	53	1	0	0	0	1	0	1	1	1	0	0	1	2	1	0	1	1	0	1	1	0
PW200	3	4	1	1	161	74	1	0	0	0	2	0	2	1	0	0	1	1	0	1	0	1	1	0	0	1	0
PW201	2	2	0	2	156	53.5	1	0	0	0	1	1	2	0	1	0	1	1	0	4	1	1	1	0	0	1	0
PW202	3	2	0	2	155	46	1	0	0	0	2	0	2	1	1	0	0	1	2	1	0	1	1	0	1	1	0
PW203	2	2	0	2	157	50	1	0	0	0	2	1	2	0	0	0	1	1	1	5	1	1	0	0	0	1	0
PW204	3	2	0	2	175	59	1	0	0	0	1	1	2	1	1	0	1	1	1	5	1	0	1	0	0	1	0
PW205	2	1	0	4	157	45.4	0	0	0	0	1	1	2	1	1	0	1	1	0	4	1	1	1	0	0	1	0
PW207	2	2	0	2	152	47	1	0	0	0	1	0	1	1	1	0	0	0	2	1	0	1	1	0	0	1	0
PW208	3	2	0	4	174	61	1	0	0	0	2	0	2	1	0	0	1	1	1	5	1	1	1	0	0	1	0
PW209	3	2	0	2	163	50	1	0	0	0	2	1	2	1	0	0	1	1	0	4	1	1	1	0	0	1	1
PW210	2	2	0	2	154	45.8	1	0	0	0	3	1	3	0	0	1	1	1	1	4	1	1	0	1	0	1	0
PW211	3	4	1	2	150	57	1	0	0	0	1	0	1	1	0	0	0	1	2	1	1	1	1	0	0	1	1
PW212	3	3	1	4	156	58	0	0	0	0	2	0	2	1	1	0	1	1	0	5	1	0	1	0	1	1	1
PW213	3	2	0	1	154	52.2	1	1	0	0	1	1	2	1	1	1	1	1	1	4	1	0	1	0	1	1	1
PW214	3	4	1	2	158	63	1	0	0	0	1	0	1	0	1	0	0	1	2	1	1	1	1	0	1	1	0
PW215	3	2	0	4	162	53.4	1	0	0	0	2	1	2	1	1	1	1	1	1	4	1	1	1	1	0	1	1
PW216	3	2	0	3	156	47.4	1	0	0	0	1	1	2	1	0	0	0	1	1	4	1	1	1	0	1	2	1
PW217	3	2	0	1	146	40	1	0	0	0	1	0	1	0	0	0	0	1	2	1	0	1	1	0	0	1	1
PW218	3	2	0	1	156	46	1	0	0	0	1	0	1	1	1	0	1	1	0	1	1	0	1	0	0	1	1
PW219	2	3	1	1	156	60.3	1	0	0	1	1	0	1	1	1	0	0	1	2	2	1	0	1	0	0	1	1
PW220	3	4	1	2	161	74.8	1	0	0	0	2	1	3	0	0	0	1	1	1	4	1	1	0	0	1	1	1
PW221	1	2	0	2	163	59.4	0	0	0	0	2	0	2	1	1	0	1	1	0	1	1	1	1	0	1	1	1
PW222	2	1	0	3	152	41.8	0	0	0	0	2	0	2	1	1	0	1	1	1	4	1	1	1	0	0	1	1
PW223	1	3	1	4	166	66.8	0	0	0	0	1	0	2	1	1	0	0	1	2	4	1	1	1	0	1	1	0
PW224	2	3	1	2	159	60	1	0	0	0	1	0	1	1	0	0	0	1	2	1	0	1	1	0	0	1	0
PW225	2	2	0	3	160	52.4	0	0	0	0	2	0	2	1	1	0	0	1	2	1	1	1	1	0	1	1	0
PW226	2	3	1	2	157	59.6	0	0	0	0	1	0	1	1	1	0	0	1	2	1	0	1	1	0	0	2	0
PW227	3	4	1	2	156	63.6	1	0	0	0	2	1	3	0	1	0	0	1	1	4	1	1	1	0	0	1	0
PW228	2	4	1	2	163	69	1	0	0	0	1	0	1	1	1	0	0	1	2	1	1	1	1	0	0	1	1
PW229	2	3	1	1	162	65	1	0	0	0	2	0	2	0	0	0	1	1	0	1	0	1	0	0	0	1	0
PW230	3	4	1	2	165	71.8	1	0	0	0	1	0	1	1	1	0	1	0	0	1	0	1	1	0	1	1	0
PW231	3	3	1	1	157	61	1	0	0	0	1	1	2	1	1	1	1	1	0	2	1	1	1	0	0	1	1
PW232	3	2	0	2	155	47.2	1	0	0	0	3	1	3	1	1	0	1	1	1	4	1	1	1	0	0	1	0
PW233	3	2	0	1	154	52.2	1	0	0	0	2	1	2	1	1	0	1	1	1	3	1	1	1	0	0	1	1
PW234	1	2	0	3	159	54	0	0	0	0	1	0	2	1	1	1	1	1	0	1	0	1	1	1	1	1	0
PW235	2	2	0	2	160	51.2	1	0	0	0	1	0	1	1	1	0	1	1	0	1	1	1	1	0	1	1	1
PW236	3	3	1	2	159	59.6	1	0	0	0	2	0	2	1	1	0	1	1	0	1	0	1	1	0	0	2	0
PW237	3	1	0	3	157	42	0	0	0	0	1	1	1	1	1	0	0	1	1	4	1	1	1	0	0	1	1
PW238	2	2	0	2	164	50	0	0	0	0	1	0	2	1	1	0	0	1	2	4	1	1	1	0	1	1	0
PW239	1	2	0	1	156	51	1	0	0	1	2	0	2	0	0	0	1	1	1	3	1	1	0	0	0	1	0
PW240	2	2	0	2	158	55	1	0	0	0	1	0	1	1	1	1	0	1	2	1	1	1	1	0	0	1	0
PW241	3	2	0	1	169	58	1	0	0	0	2	0	2	1	0	0	1	1	2	2	1	0	1	0	0	1	1
PW242	3	2	0	2	156	46	0	0	0	0	1	0	2	1	1	0	1	1	0	4	1	1	1	0	0	1	1
PW243	2	2	0	2	165	59	0	0	0	0	1	1	2	1	1	0	0	1	1	1	0	1	1	0	0	1	0
PW244	3	1	0	2	151	40	1	0	0	0	2	0	2	1	0	0	0	1	2	1	1	1	1	0	0	1	1
PW245	3	3	1	2	164	63	1	0	0	0	1	1	2	1	1	0	0	1	1	4	1	1	1	0	1	1	1
PW246	3	4	1	2	146	78	1	0	0	0	3	1	1	0	0	0	0	1	1	4	1	1	0	0	0	1	0
PW247	3	3	1	2	143	51	1	0	0	0	1	1	2	0	0	0	0	1	1	4	1	1	0	0	0	1	0
PW248	3	1	0	2	161	42.5	1	0	0	0	2	1	3	0	0	0	1	1	1	4	1	1	0	1	1	1	1
PW249	2	2	0	3	155	53.4	1	0	0	0	2	0	2	1	1	0	1	0	0	1	1	1	1	0	1	2	0
PW250	1	2	0	2	167	59.8	0	0	0	0	2	0	2	1	1	0	0	1	2	1	1	1	1	0	0	1	0
PW251	1	4	1	2	151	60	0	0	0	0	1	1	2	1	1	0	1	1	0	4	1	1	1	0	1	1	0
PW252	1	3	1	2	162	62	0	0	0	0	2	1	2	1	1	0	1	1	0	4	1	1	1	0	0	1	0
PW253	1	4	1	2	157	69	1	0	0	0	2	1	3	0	0	0	0	1	1	3	1	1	0	0	0	1	0
PW254	1	2	0	3	161	56	1	0	0	0	1	1	3	1	1	0	0	1	1	4	1	1	1	0	0	1	0
PW255	3	4	1	4	166	89	0	0	0	0	2	0	2	1	1	1	0	1	2	1	1	1	1	0	1	1	0
PW256	2	2	0	1	162	54.4	1	0	0	0	1	0	1	1	1	0	1	1	0	1	1	1	1	0	1	2	0
PW257	3	4	1	2	149	57	1	0	0	0	1	0	1	1	1	0	0	1	2	1	0	1	1	0	0	1	0
PW258	1	2	0	2	175	58	1	0	0	0	1	0	2	1	1	0	1	1	1	3	1	1	1	0	0	1	0
PW259	1	2	0	2	162	56	0	0	0	0	2	0	2	0	0	1	0	1	2	1	0	1	0	1	1	2	0
PW260	3	2	0	2	153	53.5	1	0	0	0	2	0	2	1	1	0	1	1	0	1	0	1	1	0	0	1	1
PW261	3	2	0	2	156	55.8	1	0	0	1	1	1	2	1	1	1	1	1	0	4	1	1	0	0	0	1	1
PW262	3	2	0	1	168	61.6	1	0	0	0	2	0	2	1	0	0	1	1	0	1	1	1	1	0	0	1	1
PW263	3	4	1	1	152	75.5	1	0	0	0	2	0	2	1	1	0	1	1	2	1	0	1	1	0	0	1	0
PW264	1	1	0	2	166	45	1	0	0	0	1	0	1	0	0	0	0	1	2	1	1	1	0	1	0	1	0
PW265	3	2	0	1	152	50.5	1	0	0	0	1	1	2	1	1	1	1	1	1	3	1	1	1	0	0	1	1
PW266	3	3	1	2	158	61	1	0	0	0	1	0	1	1	1	0	0	1	2	1	1	1	1	0	0	2	1
PW267	1	2	0	2	152	48.8	1	0	0	0	2	0	2	1	1	1	1	1	0	4	1	1	1	0	0	1	0
PW268	3	2	0	2	164	57	0	0	0	0	2	1	2	1	1	0	0	1	1	4	1	1	1	0	1	1	1
PW269	3	2	0	2	155	55	1	0	0	0	2	1	2	1	1	0	1	1	0	4	1	1	1	0	0	2	0
PW270	2	3	1	2	149	51.6	0	0	0	0	2	1	3	1	1	1	1	1	1	3	1	1	1	0	0	1	1
PW271	3	4	1	1	154	65.4	1	0	0	0	2	0	2	1	1	1	1	1	0	1	0	1	1	0	0	1	1
PW272	3	2	0	2	155	55	0	0	0	0	1	0	1	1	1	0	0	1	2	1	0	1	1	0	1	1	0
PW273	3	4	1	3	164	70	1	0	0	0	2	1	3	1	1	1	0	1	1	4	1	1	1	1	0	1	0
PW274	3	2	0	4	158	55	0	0	0	1	3	0	2	1	1	0	1	1	1	4	1	1	1	0	1	1	1
PW275	3	2	0	2	157	53.8	0	0	0	0	1	1	2	0	0	1	0	1	2	4	1	1	0	0	1	1	1
PW276	3	2	0	2	155	50.6	1	0	0	1	1	0	1	0	1	1	0	1	2	1	0	1	1	1	0	1	0
PW277	1	3	1	3	153	54	1	0	0	0	2	1	3	1	1	1	1	1	1	4	1	1	1	0	0	2	0
PW278	3	2	0	2	155	50.4	1	0	0	0	2	1	2	0	1	0	0	1	1	5	1	1	1	0	0	1	0
PW279	3	3	1	3	162	65	0	0	0	0	1	0	1	1	1	0	0	1	2	4	1	1	1	0	0	1	1
PW280	3	3	1	3	156	56.4	1	0	0	0	1	0	1	0	0	0	1	1	0	1	0	1	0	0	0	1	1
PW281	1	2	0	2	160	53	0	1	0	0	2	0	2	1	1	0	1	1	0	1	0	1	1	0	0	2	0
PW282	2	2	0	2	153	48	1	0	0	0	1	0	1	1	1	0	0	1	2	1	0	1	1	0	0	2	0
PW283	3	3	1	1	162	62	1	0	0	0	2	0	2	0	0	1	1	1	0	1	0	1	0	0	0	1	0
PW284	3	2	0	1	155	50.2	1	0	0	0	1	0	1	1	1	1	1	1	0	3	1	1	1	0	1	1	1
PW285	3	4	1	2	167	72	0	0	0	0	2	0	2	1	1	0	1	1	2	5	1	1	1	0	0	1	0
PW286	2	2	0		158	54	0	0	0	0	2	0	2	1	1	0	1	1	2	1	0	1	1	0	0	1	1

## Sheet: variable_name_explanation
Variable Name		Variable Explanation	Code
p_no		Patient Number
age_dx_g		Age at diagnosis	1 = <=35, 2= 36-40, 3 =41-45
bmi_dx_ng		BMI at diagnosis	1 = Underweight, 2 = Normal, 3 = Overweight, 4= Obese
g_bmi_dx_nga		BMI at diagnosis	0 = Underweight to Normal, 1 = Overweight to Obese
educate		Education	1 = Primary, 2 = Secondary, 3 = Tertiary School, 4 = Higher qualification
height		Height (cm)
weight		Weight (kg)
children		Number of children born before breast cancer	0 = 1, 1 = more than 1
smoke		Smoking	0 = No, 1 = Yes
alcohol		Alcohol (Excessive (>2 units /day) alcohol intake)	0 = No, 1 = Yes
f_dr_bc		1st degree relative with breast cancer	0 = No, 1 = Yes
max_t_stage		T stage	1 = T1, 2 = T2, 3 = T3, 4 = T4
nodal_pos		Nodal status	0 = Negative, 1 = Positive
max_tnm		TNM staging	1 = Stage I, 2 = Stage II, 3 = Stage III
er_pos		ER positive	0 = Negative, 1 = Positive
pr_pos		PR positive	0 = Negative, 1 = Positive
her2_o_e		ERB-2 neu	0 = No over expression, 1 = Overexpression
t_surg		Breast surgery	0 = Lumpectomy, 1 = Mastectomy
t_alnd		Axillary Lymph Node dissection	0 = No ALND, 1 = ALND
adj_rt		Adjuvant Radiotherapy	0 = No radiotherapy, 1 = Locoregional radiotherapy (LLRT), 2 = Breast / Chest wall
a_regimen		Chemotherapy regimen	1 = AC x 4, 2 = CMF x 6, 3 = AC x 4 followed by CMF x 4, 4 = AC x 4 followed T x 4, 5 = Others
g_chemo_dur		Duration of chemotherapy	0 = <= 64 days, 1 = > 64 days
u_cort		Use of corticosteroid during chemotherapy premedication	0 = No, 1 = Yes
tamoxifen		Hormonal therapy : Tamoxifen	0 = No, 1 = Yes
Trastuzumab		Trastuzumab	0 = No, 1 = Yes
u_tcm		Use of traditional chinese medicine since diagnosis	0 = No, 1 = Yes
s_mens		Having experienced chemotherapy-related amenorrhea	0 = No, 1 = Yes
f_meno		Menopausal status	0 = Pre, 1 = Post
